# Supplementary material
Source: Springer Nature journal article supplement (https://www.springermedizin.de/resource/supplementary/12879_2013_3120_MOESM1_ESM.pdf/9445972)

# Plateau

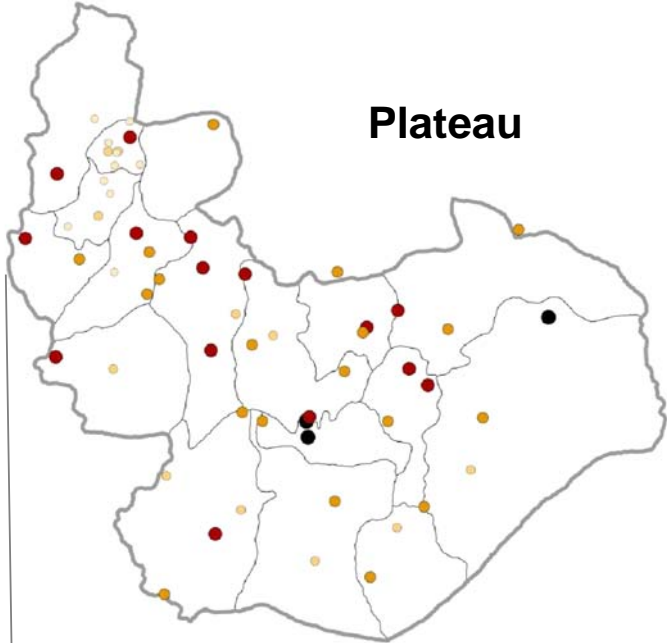

0 3.75 7.5 15 Miles

## Legend

- 0
- 1 - 20%
- 21 - 40%
- 41 - 60%
- 61 - 80%
- 81 - 100%

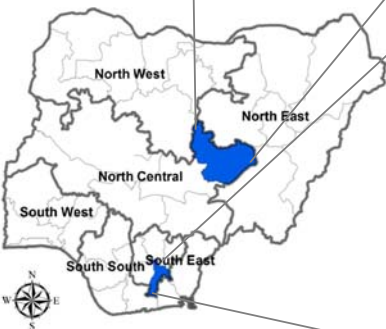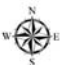

# Abia

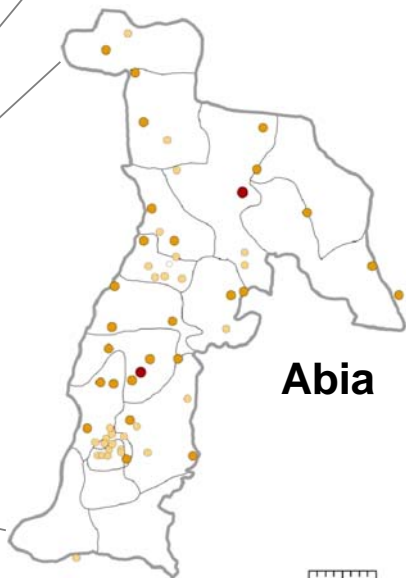

0 2.5 5 10 Miles

Supplement: MOESM1 [file 9445972]
